# Supplementary material for: Ecotoxicity of Plastics from Informal Waste Electric and Electronic Treatment and Recycling
Source: PubMed Central journal article supplement (PMC7712128; doi:10.3390/toxics8040099), 2020-11-08
Supplement: toxics-08-00099-s001.pdf [file toxics-08-00099-s001.pdf]

# Supplementary Materials: Ecotoxicity of Plastics from Informal Waste Electric and Electronic Treatment and Recycling

Maria Angela Butturi, Simona Marinelli, Rita Gamberini and Bianca Rimini

**Table S1.** Data and assumptions used for the informal treatment life cycle modelling.

| Process Step                                   | Description of Main Data and Assumptions                                                                                                                                                                                                                                                                   |
|------------------------------------------------|------------------------------------------------------------------------------------------------------------------------------------------------------------------------------------------------------------------------------------------------------------------------------------------------------------|
| Weeep                                          | Input data and assumptions according to [1,2].<br>It is assumed a production volume of 3310 kg/year and a polymer distribution of e-plastics of 35% of acrylonitrile butadiene styrene (ABS), 25% of high impact polystyrene (HIPS), 30% polypropylene (PP) and 10% of polycarbonate (PC).                 |
| Manual dismantling, segregation and separation | Input data and assumptions according to [1].<br>Dataset "Waste plastic, consumer electronics {GLO}  treatment of waste plastic, consumer electronics, unsanitary landfill, wet infiltration class (500mm)   APOS, U" from Ecoinvent 3.0 is used.                                                           |
| Burning                                        | Input data and assumptions according to [1,2,3].<br>It is assumed that the 30% of e-plastics is burned to recover metals and metals residues.<br>Dataset "Waste plastic, consumer electronics {GLO}  treatment of waste plastic, consumer electronics, open burning   APOS, U" from Ecoinvent 3.0 is used. |
| Sgrinding and shredding                        | Input data and assumptions according to [1,2].<br>Dataset " Shredding, electrical and electronic scrap/GLO U" from Ecoinvent 3.0 is used.                                                                                                                                                                  |
| Landfill of residues                           | Dataset "Waste plastic, consumer electronics {GLO}  treatment of waste plastic, consumer electronics, unsanitary landfill, wet infiltration class (500mm)   APOS, U" from Ecoinvent 3.0 is used.                                                                                                           |

**Table S2.** Data and assumptions used for the end-of-life scenarios life cycle modelling.

| Process Step and Scenario | Description of Main Data and Assumptions                                                                                                                                                                                                                                                                                                                                                                                            |
|---------------------------|-------------------------------------------------------------------------------------------------------------------------------------------------------------------------------------------------------------------------------------------------------------------------------------------------------------------------------------------------------------------------------------------------------------------------------------|
| Incineration              | Input data and assumptions according to [2].<br>Dataset 'Waste plastic, consumer electronics {GLO}  treatment of waste plastic, consumer electronics, open burning   APOS, U' from Ecoinvent 3.0 is used.                                                                                                                                                                                                                           |
| Landfill                  | Input data and assumptions according to [2].<br>Dataset 'Waste plastic, consumer electronics {GLO}  treatment of waste plastic, consumer electronics, unsanitary landfill, wet infiltration class (500mm)   APOS, U' from Ecoinvent 3.0 is used.                                                                                                                                                                                    |
| Weep-rc and weep-rs       | Input data and assumptions according to [4].<br>Datasets 'Waste plastic, consumer electronics {GLO}  treatment of waste plastic, consumer electronics, unsanitary landfill, wet infiltration class (500mm)   APOS, U'; 'Cement, Portland {RoW}  market for   APOS, U' from Ecoinvent 3.0 are used.<br>It is assumed that "2,2-Bis(4-hydroxy-3,5-dibromophenyl)propane" and "styrene" emissions are released to air, water and soil. |
| Weep-rbp                  | Input data and assumptions according to [5,6].<br>Dataset "Bitumen adhesive compound, hot {GLO}  market for   APOS, U" from Ecoinvent 3.0 is used.<br>It is assumed that Al, Cd, Cr, Cu, Fe, Mn and other emissions are released to water and soil.                                                                                                                                                                                 |

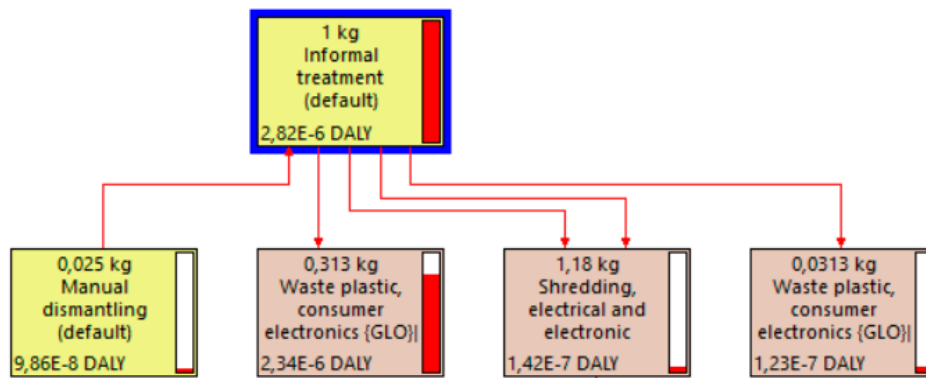

**Figure S1.** Network of the USEtox end-point results for the damage category “Human Health” associated with the informal treatment of WEEE with evidence of the impacts related to the individual process steps for 1 kg of e-plastics (1.86% cut-off).

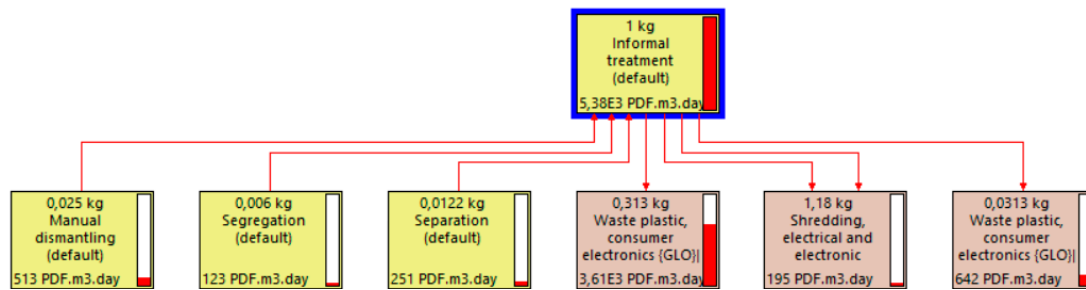

**Figure S2.** Network of the USEtox end-point results for the damage category “Ecosystems” associated with the informal treatment of WEEE with evidence of the impacts related to the individual process steps for 1 kg of e-plastics (1.86% cut-off).

**Table S3.** Environmental impacts associated with the five end-of-life scenarios (WEEEP-I, WEEEP-L, WEEEP-RD, WEEEP-RCS, WEEEP-RBP) for 1 kg of e-plastic residues (USEtox results for the impact categories “human toxicity, cancer”; human toxicity, non-cancer”; “freshwater ecotoxicity” (mid-point) and for the damage categories “human health” and “ecosystems” (end-point).

| Impact Categories                   | WEEEP-I               | WEEEP-L               | WEEEP-RC              | WEEEP-RCS             | WEEEP-RBP             |
|-------------------------------------|-----------------------|-----------------------|-----------------------|-----------------------|-----------------------|
| HT, cancer [CTU/kg]                 | $5.17 \times 10^{-8}$ | $9.06 \times 10^{-8}$ | $2.72 \times 10^{-8}$ | $2.39 \times 10^{-8}$ | $1.67 \times 10^{-8}$ |
| HT, non-cancer [CTU/kg]             | $2.50 \times 10^{-6}$ | $1.07 \times 10^{-6}$ | $6.75 \times 10^{-7}$ | $5.47 \times 10^{-7}$ | $1.47 \times 10^{-7}$ |
| Freshwater ecotoxicity [PAF.m3.day] | 23,091.59             | 41,037.82             | 8,172.20              | 6,733.497             | 2,305.77              |
| <b>Damage Categories</b>            |                       |                       |                       |                       |                       |
| Human health [DALY]                 | $3.94 \times 10^{-6}$ | $7.47 \times 10^{-6}$ | $5.88 \times 10^{-7}$ | $2.13 \times 10^{-6}$ | $1.75 \times 10^{-6}$ |
| Ecosystems [PAF.m3.day]             | 20,518.91             | 11,545.79             | 1,152.88              | 4,086.10              | 3,366.74              |

## References

1. Pathak, P.; Srivastava, R.R.; Ojasvi. Assessment of legislation and practices for the sustainable management of waste electrical and electronic equipment in India. *Renew. Sustain. Energy Rev.* **2017**, *78*, 220–232.
2. Greenpeace. *Recycling of Electronic Wastes in China & India: Workplace & Environmental Contamination Electronic Wastes Contamination*; Greenpeace: Amsterdam, The Netherlands, 2005.
3. Bakhiyi, B.; Gravel, S.; Ceballos, D.; Flynn, M.A.; Zayed, J. Has the question of e-waste opened a Pandora's box? An overview of unpredictable issues and challenges. *Environ. Int.* **2018**, *110*, 173–192, doi:10.1016/j.envint.2017.10.021.
4. Gómez, M.; Peisino, L.E.; Kreiker, J.; Gaggino, R.; Cappelletti, A.L.; Martín, S.E.; Uberman, P.M.; Positieri, M.; Raggiotti, B.B. Stabilization of hazardous compounds from WEEE plastic: Development of a novel core-shell recycled plastic aggregate for use in building materials. *Constr. Build. Mater.* **2020**, *230*, doi:10.1016/j.conbuildmat.2019.116977.
5. Santhanam, N.; Ramesh, B.; Agarwal, S.G. Experimental investigation of bituminous pavement (VG30) using E-waste plastics for better strength and sustainable environment. *Mater. Today Proc.* **2020**, *22*, 1175–1180, doi:10.1016/j.matpr.2019.12.057.
6. Jullien, A.; Proust, C.; Yazoghli-Marzouk, O. LCA of alternative granular materials—Assessment of ecotoxicity and toxicity for road case studies. *Constr. Build. Mater.* **2019**, *227*, 116737, doi:10.1016/j.conbuildmat.2019.116737.
